# Supplementary material for: Composition controlled nickel cobalt sulfide core–shell structures as high capacity and good rate-capability electrodes for hybrid supercapacitors
Source: Royal Society of Chemistry journal article supplement (doi:10.1039/c6ra03955c), 2016-01-01
Supplement: c6ra03955c1.pdf [file c6ra03955c1.pdf]

# Composition controlled nickel cobalt sulfides core-shell structure as high capacity and good rate-capability electrodes for hybrid supercapacitors

Lei Zhang,<sup>+</sup> Haitao Zhang,<sup>+,\*</sup> Long Jin, Binbin Zhang, Fangyan Liu, Hai Su, Fengjun Chun, Qinghan Li, Jinfang Peng, Weiqing Yang \*

Key Laboratory of Advanced Technologies of Materials (Ministry of Education), School of Materials Science and Engineering, Southwest Jiaotong University, Chengdu 610031, China.

\*To whom correspondence should be addressed. E-mail: [wqyang@swjtu.edu.cn](mailto:wqyang@swjtu.edu.cn),

[haitaozhang@swjtu.edu.cn](mailto:haitaozhang@swjtu.edu.cn).

[+] These authors contributed equally to this work.

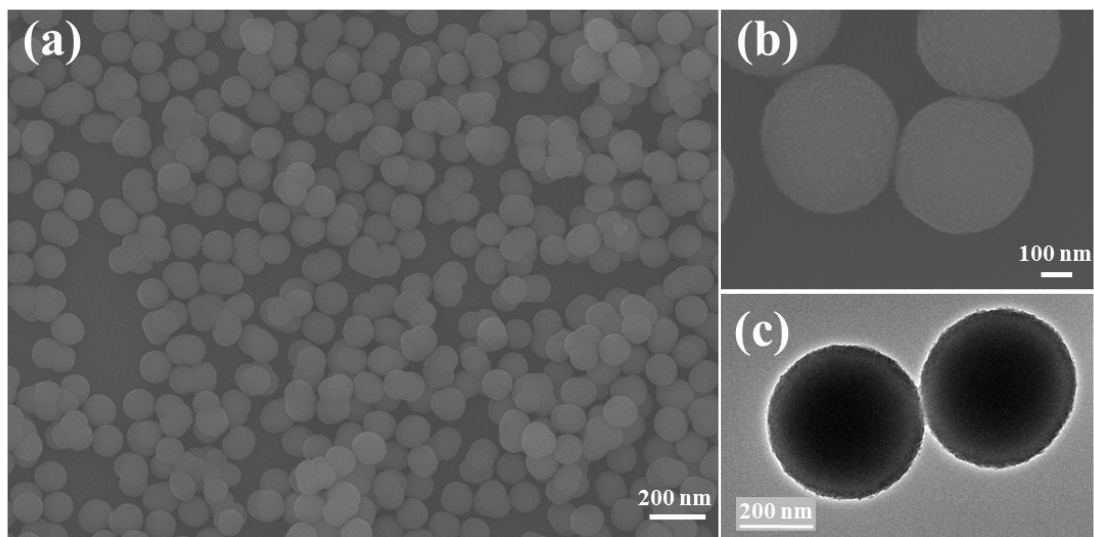

**Figure S1.** The morphology of the precursors NiCo-glycerate spheres corresponding to the  $\text{NiCo}_2\text{S}_4$  sample. (a, b) FESEM image. (c) TEM image.

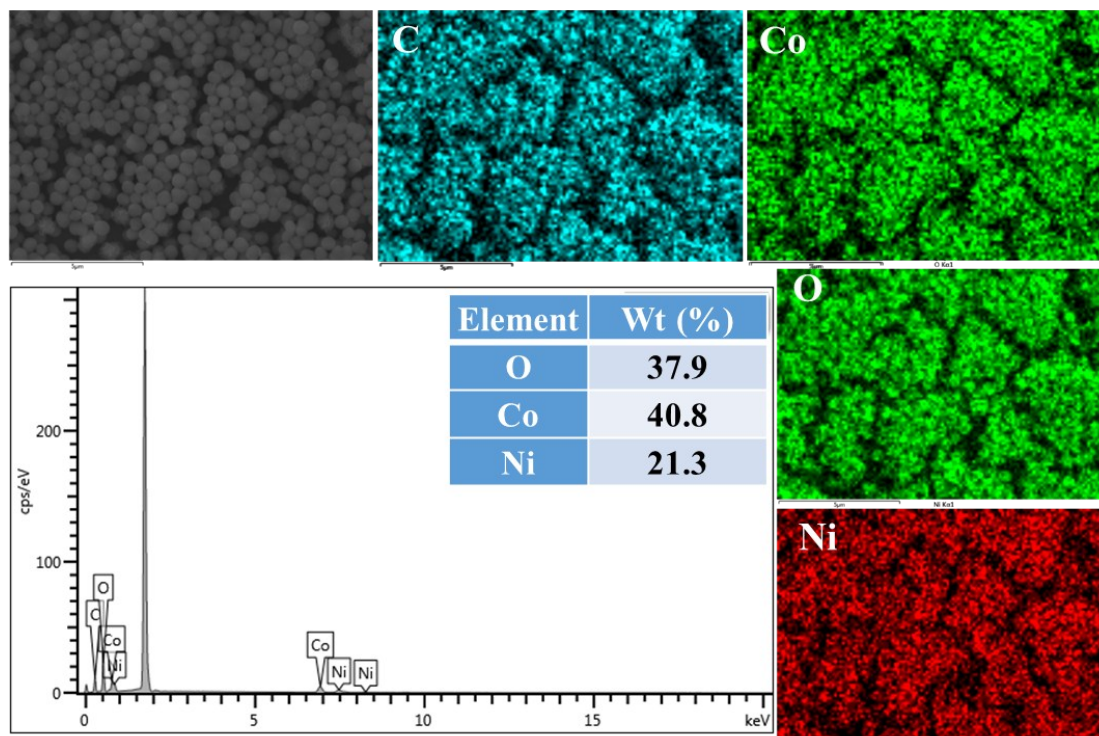

**Figure S2.** SEM image and EDS-elemental mapping images of NiCo-glycerate spheres corresponding to the  $\text{NiCo}_2\text{S}_4$  sample.

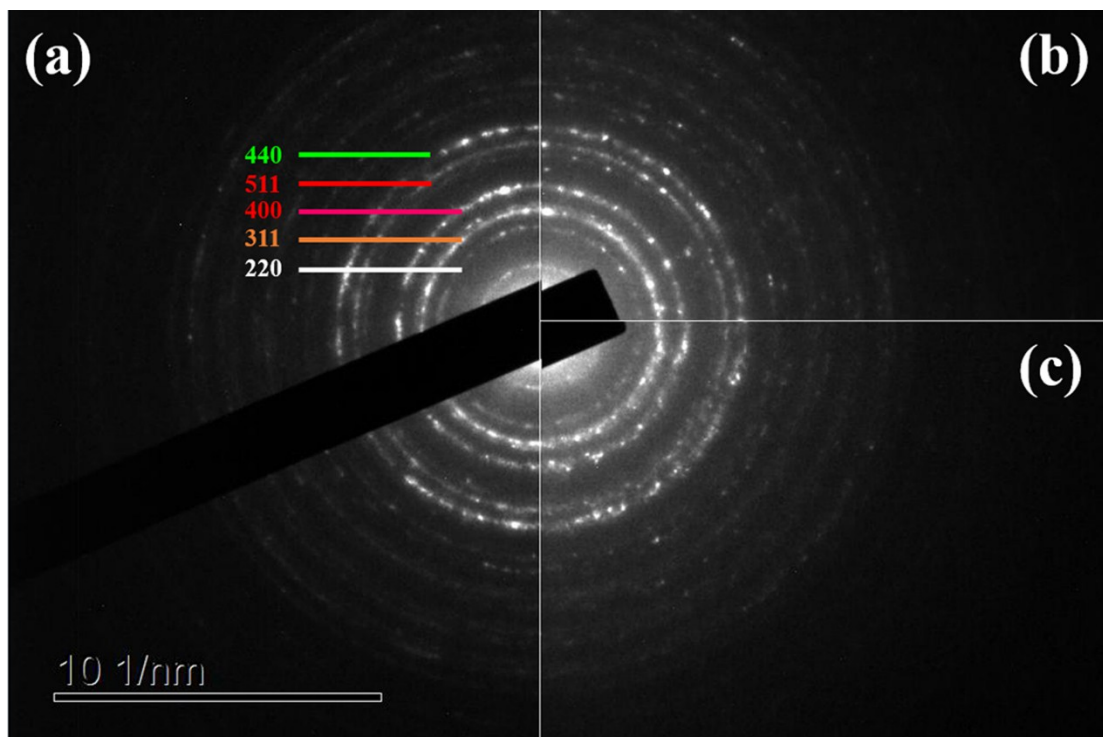

**Figure S3.** The SAED patterns of the Ni–Co sulfides: (a)  $\text{NiCo}_2\text{S}_4$ , (b)  $\text{Ni}_{1.5}\text{Co}_{1.5}\text{S}_4$ , and (c)  $\text{Ni}_2\text{CoS}_4$ , respectively.

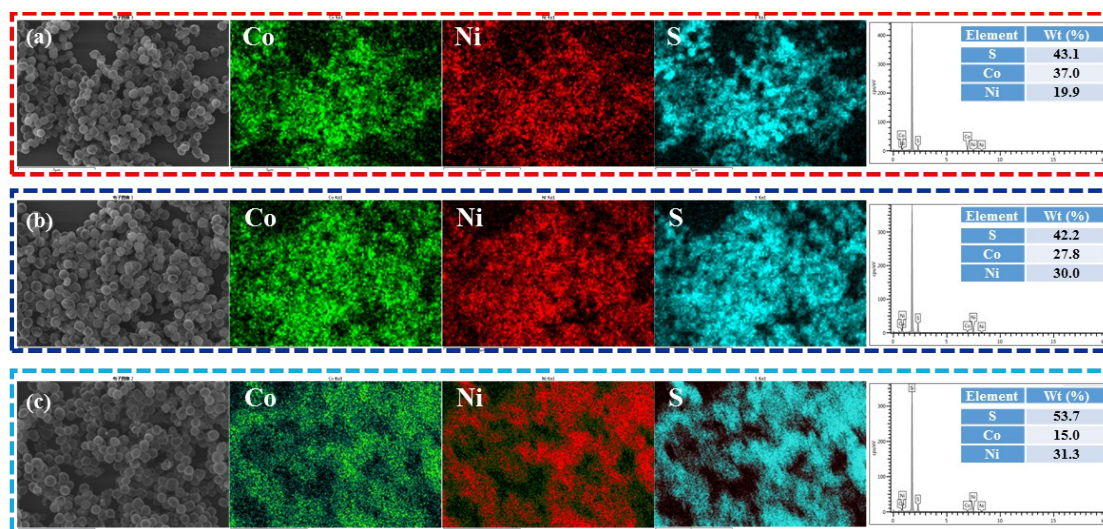

**Figure S4.** SEM-EDS elemental mapping images and its corresponding EDS spectra: (a)  $\text{NiCo}_2\text{S}_4$ , (b)  $\text{Ni}_{1.5}\text{Co}_{1.5}\text{S}_4$ , and (c)  $\text{Ni}_2\text{CoS}_4$ .

**Table S1.** The ratio of nickel and cobalt according to their XPS data.

| <i>Element</i>                                       | <i>Ni At (%)</i> | <i>Co At (%)</i> | <i>R<sub>Ni/Co</sub></i> |
|------------------------------------------------------|------------------|------------------|--------------------------|
| <i>NiCo<sub>2</sub>S<sub>4</sub></i>                 | <b>35.1</b>      | <b>64.9</b>      | <b>1/1.9</b>             |
| <i>Ni<sub>1.5</sub>Co<sub>1.5</sub>S<sub>4</sub></i> | <b>47.2</b>      | <b>52.8</b>      | <b>1/1.1</b>             |
| <i>Ni<sub>2</sub>CoS<sub>4</sub></i>                 | <b>65.4</b>      | <b>34.6</b>      | <b>1.9/1</b>             |

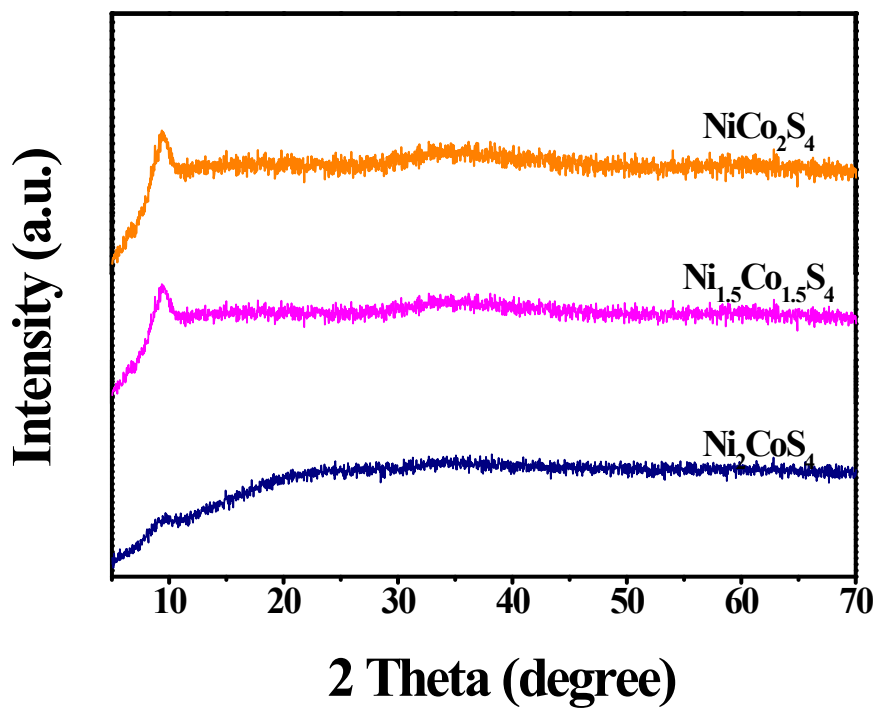

Fi

**Figure S5.** XRD patterns of the NiCo-glycerate precursor of NiCo<sub>2</sub>S<sub>4</sub>, Ni<sub>1.5</sub>Co<sub>1.5</sub>S<sub>4</sub>, and Ni<sub>2</sub>CoS<sub>4</sub>.

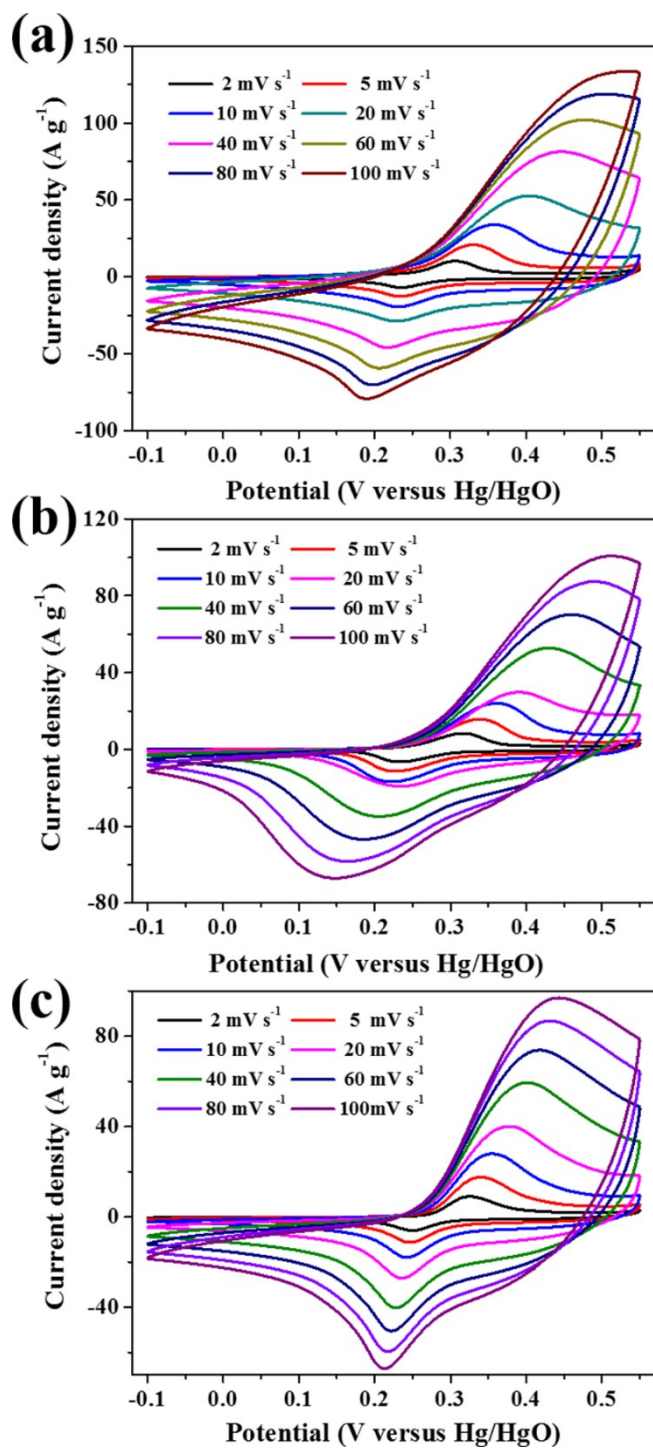

**Figure S6.** The cyclic voltammety curves with the scan rate ranging from 2 to 100  $\text{mV s}^{-1}$  of (a)  $\text{NiCo}_2\text{S}_4$ , (b)  $\text{Ni}_{1.5}\text{Co}_{1.5}\text{S}_4$ , and (c)  $\text{Ni}_2\text{CoS}_4$ .

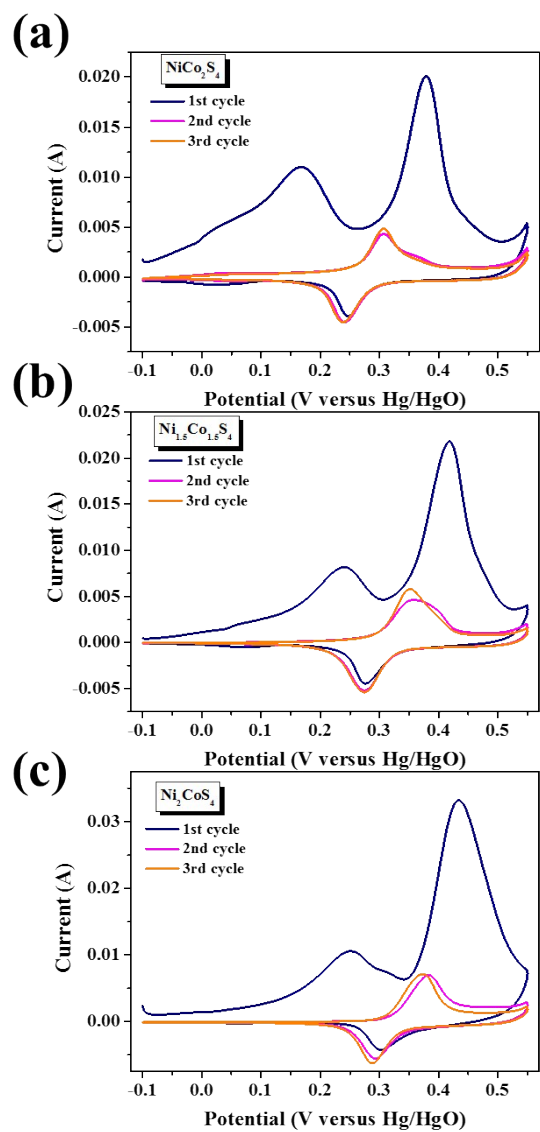

**Figure S7.** The first three CV curves at  $0.5 \text{ mV s}^{-1}$  of (a)  $\text{NiCo}_2\text{S}_4$ , (b)  $\text{Ni}_{1.5}\text{Co}_{1.5}\text{S}_4$  and (c)  $\text{Ni}_2\text{CoS}_4$ . Both of the samples are full immersed into 6M KOH solution overnight and tested with a fresh electrode.

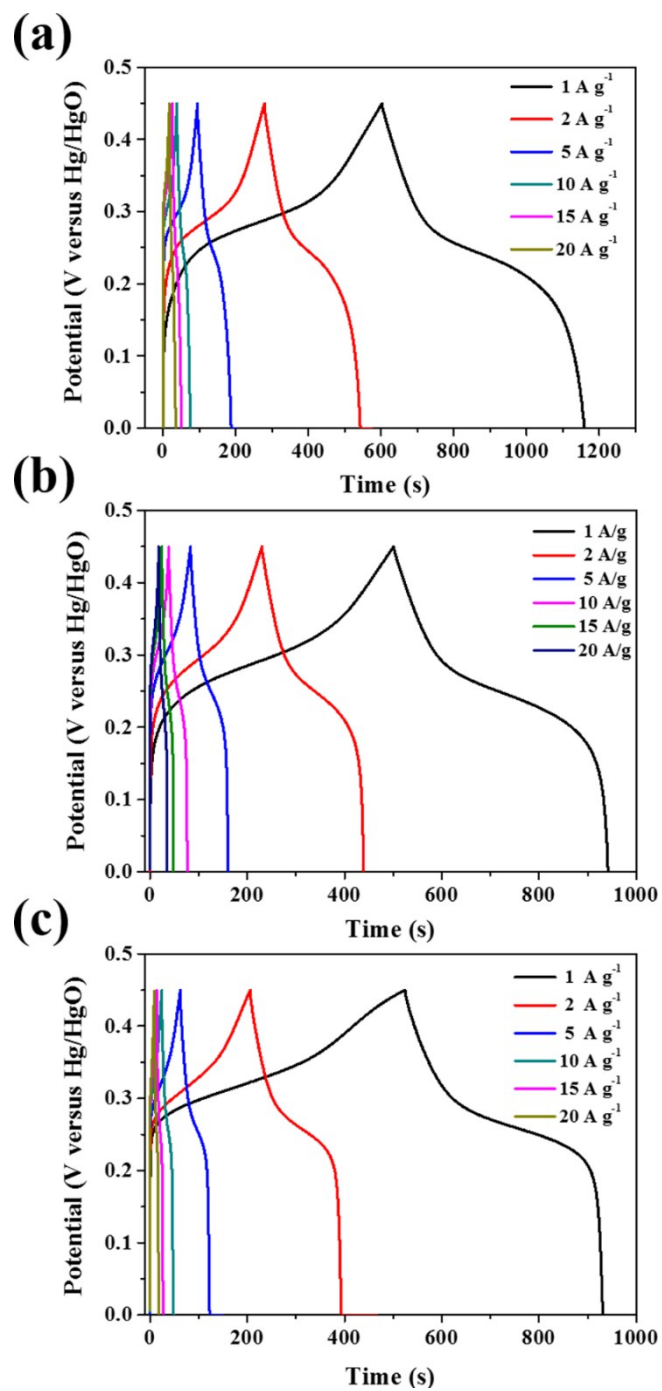

**Figure S8.** The galvanostatic charging/discharging voltage profiles with the current density ranging from 1 to 20 A g<sup>-1</sup> of (a) NiCo<sub>2</sub>S<sub>4</sub>, (b) Ni<sub>1.5</sub>Co<sub>1.5</sub>S<sub>4</sub>, and (c) Ni<sub>2</sub>CoS<sub>4</sub>.

**Table S2.** Rate capacity of Ni–Co sulfide with different micro/nano structure from recent reports in three electrode configuration.

| Reference | Micro/nano structure                                                                                                         | Capacity                                            | Specific capacity                                    | Capacity retention                                |
|-----------|------------------------------------------------------------------------------------------------------------------------------|-----------------------------------------------------|------------------------------------------------------|---------------------------------------------------|
| This work | Core-shell sphere<br>(Ni <sub>1.5</sub> Co <sub>1.5</sub> S <sub>4</sub> )                                                   | 122 mAh g <sup>-1</sup><br>(1 A g <sup>-1</sup> )   | 98 mAh g <sup>-1</sup><br>(20 Ag <sup>-1</sup> )     | <b>80%</b> from 1<br>to 20 A g <sup>-1</sup>      |
| 1         | Mesoporous nanosheet                                                                                                         | 124 mAh g <sup>-1</sup><br>(1 A g <sup>-1</sup> )   | 103 mAh g <sup>-1</sup><br>(20 Ag <sup>-1</sup> )    | <b>83.3%</b> from<br>1 to 20 A g <sup>-1</sup>    |
| 2         | Nanosheet                                                                                                                    | 173 mAh g <sup>-1</sup><br>(1 A g <sup>-1</sup> )   | 705 mAh g <sup>-1</sup><br>(20 Ag <sup>-1</sup> )    | <b>68%</b> from 1<br>to 20 A g <sup>-1</sup>      |
| 3         | Hollow tubular syructure                                                                                                     | 159 mAh g <sup>-1</sup><br>(2 A g <sup>-1</sup> )   | 108 mAh g <sup>-1</sup><br>(20 Ag <sup>-1</sup> )    | <b>68%</b> from 2<br>to 20 A g <sup>-1</sup>      |
| 4         | Hollow nanoneedle<br>arrays on carbon fiber<br>paper                                                                         | 208 mAh g <sup>-1</sup><br>(1 A g <sup>-1</sup> )   | 129 mAh g <sup>-1</sup><br>(20 A g <sup>-1</sup> )   | <b>62%</b> from 1<br>to 20 A g <sup>-1</sup>      |
| 5         | Hollow nanoprism                                                                                                             | 136 mAh g <sup>-1</sup><br>(1 A g <sup>-1</sup> )   | 89 mAh g <sup>-1</sup><br>(20 Ag <sup>-1</sup> )     | <b>65%</b> from 1<br>to 20 A g <sup>-1</sup>      |
| 6         | NiCo <sub>2</sub> S <sub>4</sub> /Ni(OH) <sub>2</sub> core-<br>shell heterostructured<br>nanotube arrays on<br>carbon-fabric | 450 mAh g <sup>-1</sup><br>(1 mA cm <sup>-2</sup> ) | 266 mAh g <sup>-1</sup><br>(20 mA cm <sup>-2</sup> ) | <b>59%</b> from 1<br>to 20 mA<br>cm <sup>-2</sup> |
| 7         | Nanotube array                                                                                                               | 302 mAh g <sup>-1</sup><br>(3 A g <sup>-1</sup> )   | 158 mAh g <sup>-1</sup><br>(20 Ag <sup>-1</sup> )    | <b>52%</b> from 3<br>to 20 A g <sup>-1</sup>      |
| 8         | Hollow hexagonal                                                                                                             | 48 mAh g <sup>-1</sup><br>(1 A g <sup>-1</sup> )    | 25 mAh g <sup>-1</sup><br>(20 Ag <sup>-1</sup> )     | <b>53%</b> from 1<br>to 20 A g <sup>-1</sup>      |
| 9         | Nanosheet on graphene                                                                                                        | 129 mAh g <sup>-1</sup><br>(1 A g <sup>-1</sup> )   | 76 mAh g <sup>-1</sup><br>(20 Ag <sup>-1</sup> )     | <b>50%</b> from 1<br>to 20 A g <sup>-1</sup>      |



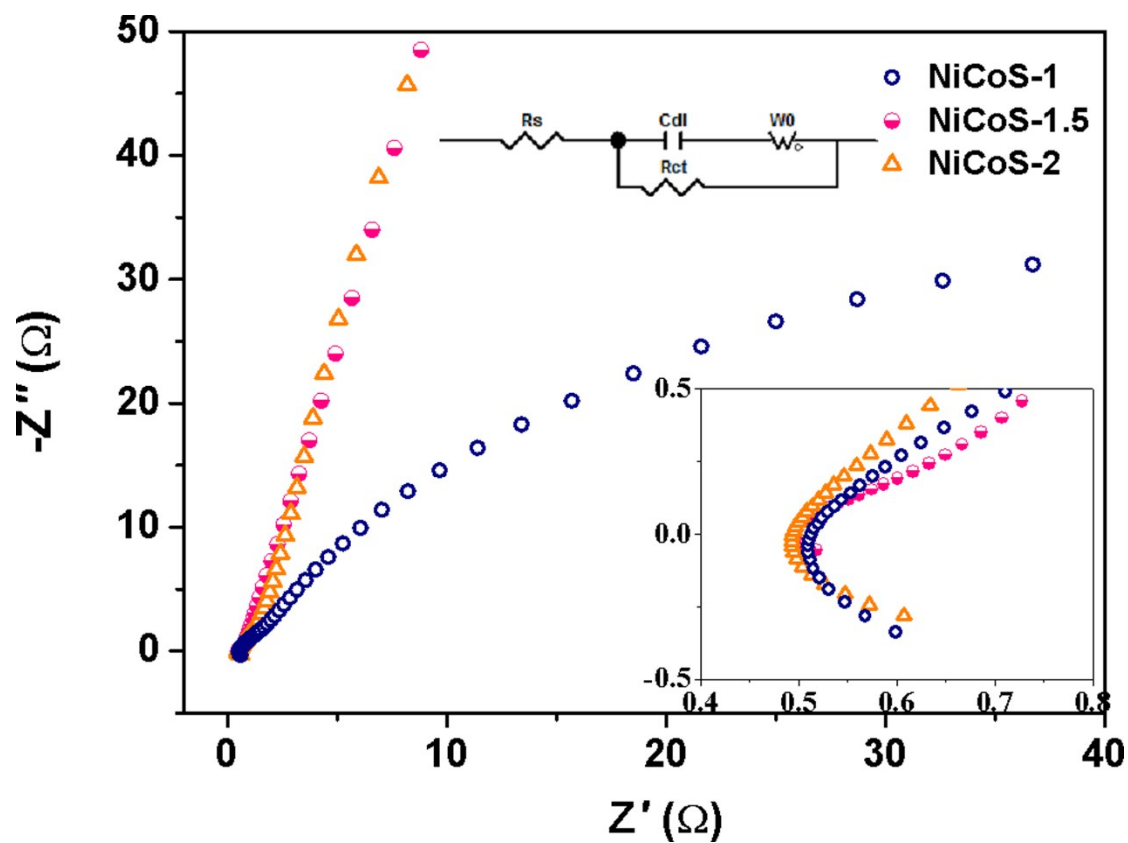

**Figure S9.** The electrochemical impedance spectra of (a)  $\text{NiCo}_2\text{S}_4$ , (b)  $\text{Ni}_{1.5}\text{Co}_{1.5}\text{S}_4$ , and (c)  $\text{Ni}_2\text{CoS}_4$ .

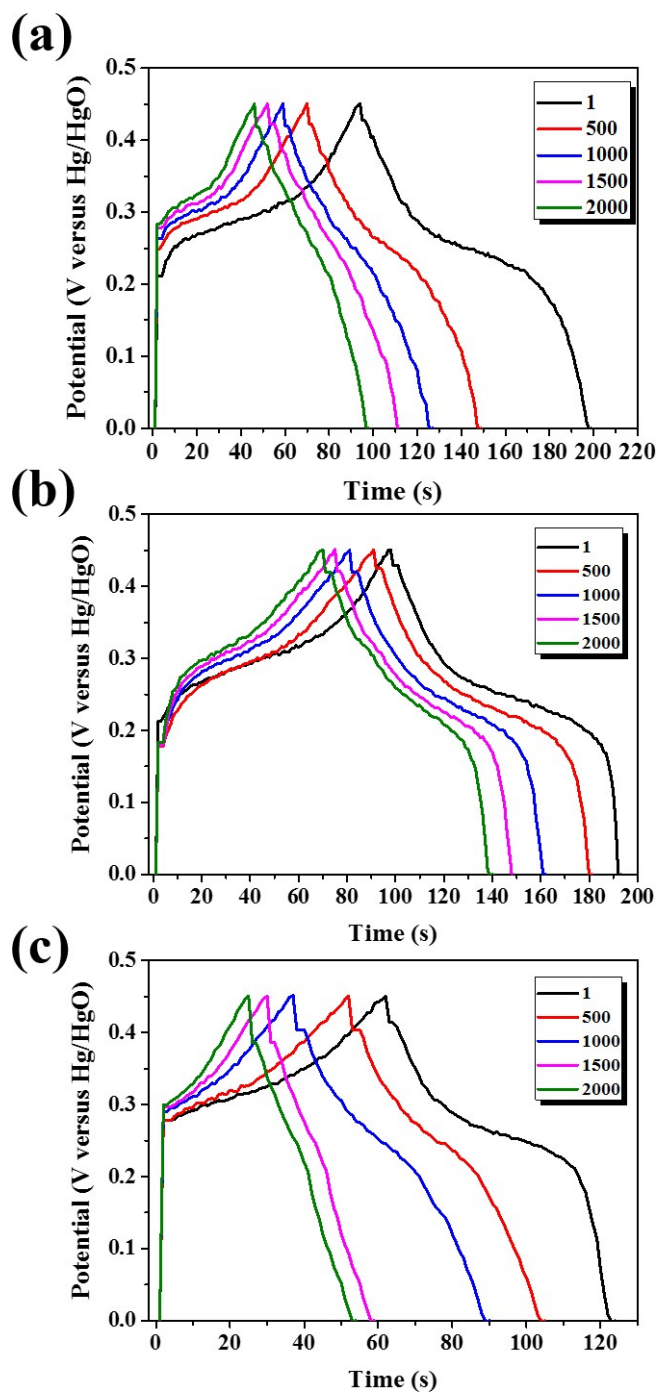

**Figure S10.** The 1<sup>st</sup>, 500<sup>th</sup>, 1000<sup>th</sup>, 1500<sup>th</sup>, 2000<sup>th</sup> charge and discharge cycles of (a)  $\text{NiCo}_2\text{S}_4$ , (b)  $\text{Ni}_{1.5}\text{Co}_{1.5}\text{S}_4$ , and (c)  $\text{Ni}_2\text{CoS}_4$  during 2000 cycles long-term cycling test.

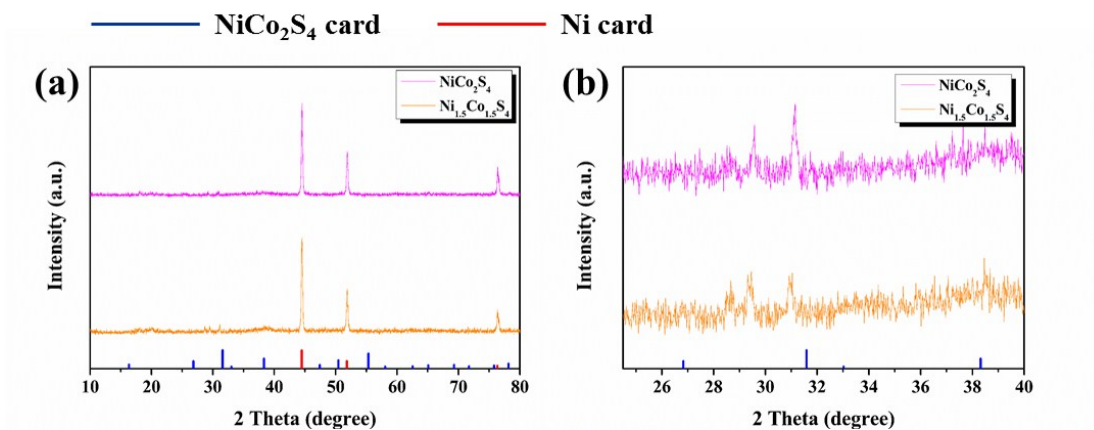

**Figure S11.** XRD pattern of the nickel cobalt sulfides samples with nickel foam were characterized after 2000 cycles test ranging from (a)  $10^\circ$  -  $80^\circ$ , and (b)  $24.5^\circ$  -  $40^\circ$ .

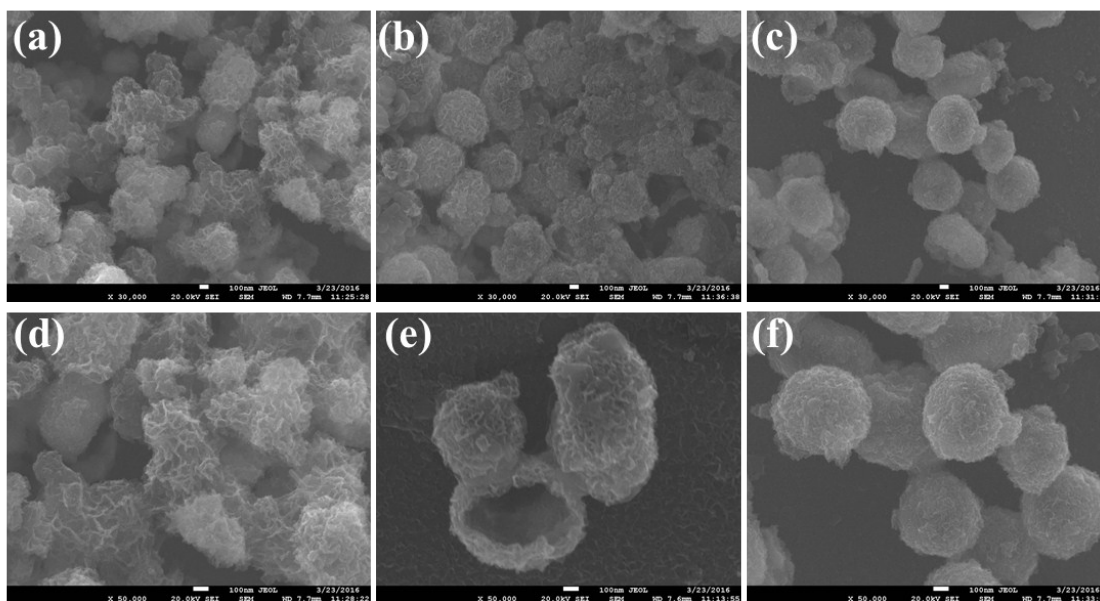

**Figure S12.** FESEM images of the Ni–Co sulfides: (a, d).  $\text{NiCo}_2\text{S}_4$ , (b, e)  $\text{Ni}_{1.5}\text{Co}_{1.5}\text{S}_4$ , and (c, f)  $\text{Ni}_2\text{CoS}_4$  after cycling for 2000 cycles at a current density of  $5 \text{ A g}^{-1}$ , respectively.

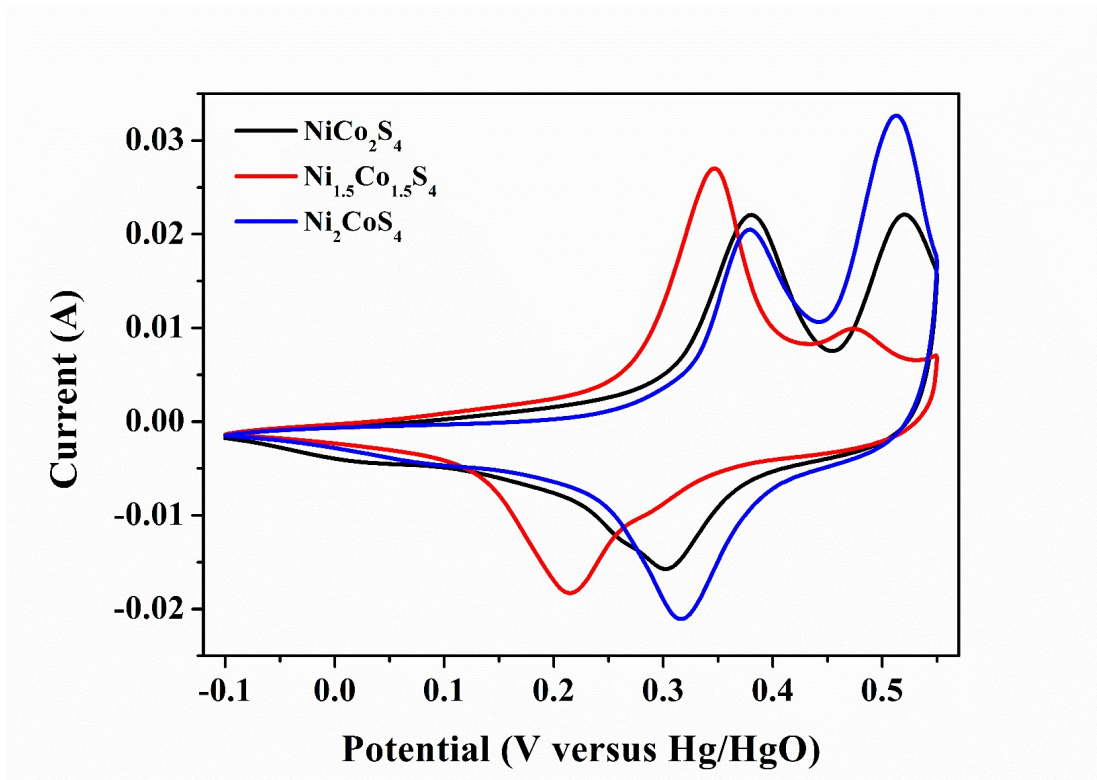

**Figure S13.** CV curves the nickel cobalt sulfides measured after 2000 charge and discharge cycles.

## Supplementary Reference

1. Z. Wu, X. Pu, X. Ji, Y. Zhu, M. Jing, Q. Chen and F. Jiao, *Electrochim Acta*, 2015, **174**, 238-245.
2. L. F. Shen, J. Wang, G. Y. Xu, H. S. Li, H. Dou and X. G. Zhang, *Adv Energy Mater*, 2015, **5**, 1400977-1400984.
3. Y. M. Chen, Z. Li and X. W. Lou, *Angew Chem Int Edit*, 2015, **54**, 10521-10524.
4. X. Xiong, G. Waller, D. Ding, D. Chen, B. Rainwater, B. Zhao, Z. Wang and M. Liu, *Nano Energy*, 2015, **16**, 71-80.
5. L. Yu, L. Zhang, H. B. Wu and X. W. Lou, *Angew Chem Int Edit*, 2014, **53**, 3711-3714.
6. J. Zhang, H. Gao, M. Y. Zhang, Q. Yang and H. X. Chuo, *Appl Surf Sci*, 2015, **349**, 870-875.
7. J. Pu, T. T. Wang, H. Y. Wang, Y. Tong, C. C. Lu, W. Kong and Z. H. Wang, *Chempluschem*, 2014, **79**, 577-583.
8. J. Pu, F. L. Cui, S. B. Chu, T. L. Wang, E. H. Sheng and Z. H. Wang, *Acs Sustain Chem Eng*, 2014, **2**, 809-815.
9. S. J. Peng, L. L. Li, C. C. Li, H. T. Tan, R. Cai, H. Yu, S. Mhaisalkar, M. Srinivasan, S. Ramakrishna and Q. Y. Yan, *Chem Commun*, 2013, **49**, 10178-10180.
